1 Nitric Oxide Affects Short-Term Olfactory Memory in the Antennal Lobe of *Manduca Sexta*

2 S.L. Gage, K.C. Daly, and A. Nighorn

3 Key Words: Olfaction, Learning, Memory, Circadian, NOS inhibition, Moth

4 Summary

5 Nitric oxide (NO) is thought to play an important neuromodulatory role in olfaction. We are using  
6 the hawkmoth *Manduca sexta* to investigate the function of NO signaling in the antennal lobe (AL;  
7 primary olfactory network in invertebrates). We have found previously that NO is present at baseline  
8 levels, dramatically increases in response to odor stimulation, and alters the electrophysiology of AL  
9 neurons. It is unclear, however, how these effects contribute to common features of olfactory systems  
10 such as olfactory learning and memory, odor detection, and odor discrimination. In this study, we have  
11 used chemical detection and a behavioral approach to further examine the function of NO in the AL. We  
12 have found that basal levels of NO fluctuate with the daily light cycle being higher during the nocturnal  
13 active period. NO also appears necessary for short-term olfactory memory. NO does not appear to affect  
14 odor detection, odor discrimination between dissimilar odorants, or learning acquisition. These findings  
15 may suggest a modulatory role for NO in the timing of olfactory-guided behaviors.

16 Introduction

17 Nitric oxide (NO) is highly expressed in olfactory systems (Bredt et al., 1991; Muller and  
18 Hildebrandt, 1995; Elphick et al., 1995; Hopkins et al., 1996; Kendrick et al., 1997; Nighorn et al., 1998;  
19 Fujie et al., 2002; Collmann et al., 2004), yet its function remains unclear. The structural organization of  
20 the primary olfactory network suggests diffusible messengers like NO could be fundamental in olfactory  
21 processing (Breer and Shepherd, 1993). Sensory afferents innervate dense, spheroidal neuropils called  
22 glomeruli and synapse with secondary cells that facilitate signaling between and within olfactory  
23 glomeruli (Price and Powell, 1970; Pinching, 1970). A glomerulus is suggested to function as a unit  
24 (Kauer and Cinelli, 1993; Hildebrand and Shepherd, 1997; Mori et al., 1999; Bozza et al., 2002;  
25 Wachowiak and Shipley, 2006) and is often surrounded by several layers of glial processes (Tolbert and  
26 Oland, 1990; Hildebrand and Shepherd, 1997). As a diffusible messenger, NO may modify signaling  
27 within a glomerulus because of its limited diffusion (Breer and Shepherd, 1993).

28 NO is produced from nitric oxide synthase (NOS), a complex  $\text{Ca}^{2+}$ -activated enzyme that  
29 catalyzes the conversion of L-Arginine to form NO. NO affects neurons through multiple signaling  
30 cascades including those triggered by the soluble guanylyl cyclase/cyclic guanosine monophosphate

(sGC/cGMP) pathway and through s-nitrosylation. NOS, and NO-target sGC are highly expressed in the AL and olfactory bulb in all species investigated (Bredt et al., 1991; Muller and Hildebrandt, 1995; Elphick et al., 1995; Hopkins et al., 1996; Kendrick et al., 1997; Nighorn et al., 1998; Fujie et al., 2002; Collmann et al., 2004). In *Manduca*, NOS is localized to the olfactory receptor neurons; and sGC is found in almost all projection neurons, some local interneurons, and the serotonin-immunoreactive neuron (Collmann et al., 2004). Studies from *Manduca*, land slugs, and mice demonstrate that NO is produced upon odor stimulation and/or electrical stimulation to the olfactory nerve (Collmann et al., 2004; Fujie et al., 2002; Lowe et al., 2008). In the antennal lobe of *Manduca*, NO production patterns are spatially focused and dependent on the identity and concentration of the odor stimulus (Collmann et al., 2004). In AL neurons, NO affects basal neuronal activity suggesting a persistent presence of NO (Wilson et al., 2007), and affects whole-cell currents (Higgins et al., 2012). These studies indicate that NO has profound physiological effects in the olfactory system that are likely to influence olfactory processing and olfactory-guided behaviors.

In addition to potentially affecting the primary functioning of the olfactory system, NO is thought to play a role in olfactory learning and memory (for review, see Susswein et al., 2004). Insights from other animal species have demonstrated that NOS inhibition affects a wide variety of learning and memory paradigms that include contextual fear learning in mice (Kelley et al., 2010), delayed visual recall in monkeys (Prendergast et al., 1997a), negative patterning in turtles (Yeh and Powers, 2005), and spatial navigation in rats and mice (Prendergast et al., 1997b; Mutlu et al., 2011). Specifically in olfaction, NOS inhibition affects odor associations in sheep (Kendrick et al., 1997), new-born rat pups (Samama and Boehm, 1999), and land slugs (Yabumoto et al., 2008). Interestingly, an already-learned association is unaffected by NOS inhibition (Yamada et al., 1995; Muller, 1996; Kendrick et al., 1997; Samama and Boehm, 1999; Yeh et al., 2005) suggesting the role of NO is specific to learning processes and not retrieval. In honeybees, NOS inhibition experiments reveal that learning acquisition is intact, but a specific form of long-term memory is impaired (Muller, 1996). These results support the idea that different forms of memory occur in parallel and are formed by distinct molecular mechanisms. Taken altogether, NO could underlie molecular substrates needed for learning acquisition, or underlie those that form specific memory traces.

In this study, we explore our working hypothesis that NO is a modulator of olfactory-guided behavior. We first question whether basal levels of NO change during the daily light cycle. To know when NO is produced in the AL provides clues as to how it is utilized in the olfactory system. Like many nocturnal insects, *Manduca* depends on its olfactory system to find mates, feed and lay eggs during scotophase, or subjective night. If NO production is variable and increases during this active period, it

would suggest a potential role for NO in olfactory-guided behaviors. We show that NO concentrations are variable and higher during scotophase. We then combine NOS inhibition in the ALs with a learning paradigm utilizing the proboscis extension reflex (PER) to ask three basic questions: (1) does NO affect odor detection, (2) does NO affect discrimination between dissimilar odorants, and (3) does NO affect the odor association process through learning or memory. We show that NO specifically affects short-term memory. NO does not appear to affect odor detection, odor discrimination between dissimilar odorants, or learning acquisition. Given our results, we speculate that NO may play an important ecological role in the timing of olfactory-guided behaviors.

## Methods and Materials

### *Animals:*

*Manduca sexta* (Lepidoptera: Sphingidae) were reared in the Department of Neuroscience at the University of Arizona. Animals were raised on an artificial diet (see Table S1 in supplementary material) and maintained under a long-day photoperiod regimen (17 hours light/ 7 hours dark) at 25°C and 50-60% relative humidity. Females, at pupae stage 16 were transferred into a biological incubator (Model I-36VL; Percival Scientific Inc., Perry, IA) under a 12 hour light/12 hour dark cycle and kept at 25°C at 50-60% relative humidity. Unfed, four to five-day old females were used for both NO detection and the learning experiments.

### *NO Detection and Analysis:*

NO was measured using the inNO-T system and the IV series of NO sensors (both from Innovative Instruments, Inc, Tampa, FL). In this system, the NO sensor records the diffusion of NO from the animal tissue to the sensor surface. The electrical current produced is proportional to the concentration of NO in the tissue and is calibrated for each sensor. For the particular sensor used, 1 pA was equal to 1.89 nM.

To measure NO in *Manduca*, brains from four-day old females were dissected during the third hour post scotophase or photophase (12 hours apart on a 12 hours light/12 hours dark cycle). Each brain was divided into ALs, optic lobes and the remaining brain. Each area of the brain was individually placed into liquid nitrogen and stored at -80°C until analysis. Lobes were then placed on dry ice and individually homogenized using a T8.01 Netzgerat IKA Labortechnik homogenizer (Janke and Kunkel GmbH and Co., Staufen, Germany) in 50  $\mu$ L of saline. The homogenized lobe was immediately measured for NO concentration using the inNO-T system. After measuring each lobe, the sensor was replaced into saline to

re-obtain a baseline current. Concentrations were measured by taking the delta immediately prior to the lobe measurement (in saline) to the peak of the NO current.

#### *Pharmacology and Microinjection Surgery:*

The NOS inhibitor, *N*-Nitro-L-arginine methyl ester (L-NAME; Sigma) was dissolved in filtered physiological saline (150 mM NaCl, 3 mM CaCl<sub>2</sub>, 3 mM KCl, 10 mM TES; pH 6.9), and used at a 15 mM concentration. This concentration was determined to be the minimal effective dose in extracellular recording in *M. sexta* (Wilson et al., 2007) and approximate to the concentrations used in molluscan preparations (Gelperin, 1994).

Drug delivery into the ALs was performed according to the method described in Lei et al., 2009. Animals were restrained in a plastic tube and an hour glass window was cut in the head capsule (Fig. 1). The ALs were visualized by moving aside connective tissue with fine forceps. Quartz pipettes (O.D. 1.0 mm ID .70, Sutter Instruments, San Diego, CA) were pulled with a Model P-2000 puller (Sutter Instruments, San Diego, CA) and clipped to allow solution passage. Pipettes were filled with L-NAME or saline and manually inserted into each AL with 10 drops (total: 33 nL  $\pm$  11 nL std. dev.; N=3) administered per lobe using a General Valve Corp, Picospritzer II (East Hanover, NJ) (volume distribution visualized by injecting undiluted blue food coloring (Fig. 1)). The moths were sealed by replacing the cut window and applying myristic acid (Sigma). The identity of the drug vs. saline control was blind to both the experimenter performing the surgery and the experimenter observing behavior in all experiments.

#### *Olfactory Stimuli and Delivery:*

The olfactory stimuli tested include: (1) a synthetic *Datura Wrightii* blend that mimics the main components and their proper ratios emitted from *D. Wrightii* (*M. sexta* host-plant) (Riffell et al., 2008b & 2009); (2) hibiscus oil blend (diluted 1:1000; Select Oils, Tulsa, OK); (3) linalool (5  $\mu$ g/ $\mu$ L; Sigma); (4) methyl salicylate (5  $\mu$ g/ $\mu$ L; Sigma) and (5) control air (blank). Mineral oil (Sigma) was the vehicle for all odors/odorants used. Concentrations were chosen based upon maximal cellular responses in the *Manduca* AL during multi-channel recording (Dacks et al., 2008). Olfactory stimuli were delivered by a solenoid controlled air stream into an odor-containing glass syringe. Each syringe contained 10  $\mu$ L of the odor/odorant on a piece of filter paper.

The odors/odorants chosen as the conditioned stimulus (CS+) were selected based upon ecological significance and studies in the literature. We initially used *D. Wrightii* to assess the role of NO in odor detection. *D. Wrightii* is the preferred host-plant of *Manduca*, which is known to illicit innate

responses (Raguso and Willis, 2002 & 2005; Riffell et al., 2009). We instead found an effect on learning or memory and confirmed our findings using a hibiscus. Hibiscus is not a reported host-plant of hawkmoths and serves as a novel odor to gauge learning and memory. Linalool and methyl salicylate represent two commonly encountered chemical classes in plant headspaces: terpenoids and aromatics. Terpenoids like linalool comprise upwards of 70% of all volatiles emitted from *Datura*; and aromatics like methyl salicylate are another major component (Riffell et al., 2008b).

# *Learning and Memory Assays:*

*Appetitive conditioning:* The proboscis extension reflex (PER) is an unconditioned feeding reflex that was first employed for olfactory conditioning in honeybees (Takeda, 1961; for review of olfactory conditioning in honeybees see Giurfa and Sandoz, 2012). The neuroanatomy underlying the proboscis extension in *Manduca* is well characterized (Davis and Hildebrand, 2006) and the PER learning paradigm is a modified version of the method described in Daly and Smith, 2000. Animals were restrained in a plastic tube with eyes covered (wax) prior to surgery and conditioning. A clear, plastic tube was situated over the elongated proboscis to secure a uniform position of the proboscis and to observe maximum pumping motion and extension. Five-day old moths were trained in a forward-paired conditioning paradigm to associate an odor with a sucrose reward [1  $\mu$ L, 25% sucrose solution ((the latter chosen by sucrose-dominant sugar concentrations present in *Datura* nectar, (Raguso et al., 2003; Guerenstein et al., 2004, Farkus et al. 2011))]. A five-second odor pulse was delivered to the odor-containing syringe positioned five centimeters from the right antenna. Three seconds into the pulse, the sucrose was applied to the tip of the proboscis with a pipette. This sequence was repeated in all assays for a total of six trials spaced four minutes apart.

*Learning and memory:* Animals were removed from the biological incubator (Percival Scientific Inc., Perry, IA) one and a half hours into scotophase and kept in dark conditions under red light. Moths were restrained and injected with L-NAME, 15-30 minutes prior to conditioning. Conditioning began two and a half hours into scotophase. One hour after conditioning completion, moths were tested for learning by the presentation of odor alone and recording proboscis extension. Each animal was tested three times with a five-second odor pulse. A positive test resulted in observed feeding movements of the proboscis including full extension, uncoiling, and pumping of the “knee” (see Movie 1-3 in supplementary material). Animals were scored based on each odor presentation. For example, “moth A showed proboscis extension one out of three times to the CS+.” Animals were also tested with a blank syringe to test the effect of air flow (Blank PER% = 23%). To examine the effect of L-NAME in different memory stages,

the moths were injected with L-NAME prior to conditioning with hibiscus and tested at five minutes, one hour, four hours, and twenty-four hours post-conditioning.

*Odor detection:* To test whether the L-NAME impairment was caused by a learning or memory deficit or a disruption in odor detection, L-NAME injections were performed *after* conditioning. Injections were performed 15-30 minutes prior to testing, and testing commenced one hour post conditioning.

*Discrimination between dissimilar odorants:* Some neuromodulators, like serotonin, have been suggested to enhance contrast resolution between different molecular classes of odorants (Dacks et al., 2008). NO was tested in this capacity by determining the animal's ability to discriminate between two commonly encountered odorants in plant headspaces: linalool (a monoterpenoid structure) and methyl salicylate (an aromatic structure). Animals were conditioned to associate one odorant with a sucrose reward. Odor-sucrose conditioning was performed *before* L-NAME injection to rule out association impairments from lack of NO. Odor-sucrose conditioning consisted of the presentation of linalool (monoterpenoid), and methyl salicylate (aromatic), to each animal six times spaced four minutes apart. One odorant was alternatively assigned per experiment day to be the CS+ and paired with sucrose. The CS+ was always presented first. The other odorant was presented without sucrose (CS-). The animals were injected and then tested one hour later after conditioning. Evaluation of odor discrimination consisted of the CS+ and CS- presented alternatively (CS+ 2X; CS- 2X per animal) and evaluated on the proboscis extension criteria described above.

#### *Statistical Analysis:*

All statistical analyses were performed using JMP 9.0.1 (SAS). NO concentrations between scotophase and photophase were evaluated for statistical significance using a two-tailed Student's T Test. In all learning and memory experiments, responses were recorded with a 1 or 0 to employ parametric tests. A one-way ANOVA was employed with a Tukey-Kramer HSD post-hoc test to evaluate means among groups. In discrimination learning experiments, a one-way ANOVA and Matched Pairs analysis was used. In all tests,  $\alpha = .05$  and a 95% confidence level was used. Data is expressed as means  $\pm$  standard error unless otherwise noted.

#### Results

*NO levels are higher during scotophase in the AL and optic lobes*

NO concentrations in the ALs, the optic lobes, and the remainder of the brain were measured at a singular time point (three hours post-induction of light cycle) in scotophase and photophase. NO levels are substantially higher in the ALs and optic lobes during scotophase, when the moths are most active (Fig. 2). In the ALs, the mean NO concentration during scotophase [ $115.70 \text{ nM} \pm 19.75 \text{ s.d.}$ ,  $N = 11$  from 8 moths] is significantly higher than the mean concentration during photophase [ $47.86 \text{ nM} \pm 15.59 \text{ s.d.}$ ,  $N = 8$  from 5 moths] ( $T(17) = 8.04$ ,  $P = <.0001$ ). Similarly, in the optic lobes, the mean NO concentration during scotophase [ $131.68 \text{ nM} \pm 36.72 \text{ s.d.}$ ,  $N = 8$  from 5 moths] is significantly higher than during photophase [ $42.72 \text{ nM} \pm 23.24 \text{ s.d.}$ ,  $N = 8$  from 6 moths] ( $T(14) = 5.78$ ,  $P = <.0001$ ). The remainder of the brain, encompassing the protocerebrum, tritocerebrum and the sub-esophageal ganglion, does not show a significant change in NO levels with light phase [scotophase:  $\mu 79.22 \text{ nM} \pm 36.99$ ,  $N = 5$ ; photophase:  $\mu 82.87 \text{ nM} \pm 34.55$ ,  $N = 6$ ; ( $T(9) = .17$ ,  $P = .87$ )]. These results suggest NO concentrations are subject to light cycle and likely indicative of roles in nocturnal activity.

#### *NOS inhibition impairs odor associations and does not affect odor detection*

The effect of NO in olfactory learning was examined using associative-odor learning assays paired with NOS inhibition before and after conditioning (Fig. 3A). This experiment was first performed using *Datura*, the preferred host-plant of *Manduca*, as the conditioned odor. Conditioning was performed 2.5 hours into scotophase to mimic the approximate time of day *Manduca* forage in the field (Gregory, 1963; Raguso and Willis, 2005). When NOS is inhibited before conditioning, there is a significant reduction in the number of proboscis extensions one hour later as compared with vehicle controls ( $f(1, 64) = 11.18$ ,  $P = .001$ ,  $N = 11, 11$ ). To test whether this impairment is the result of learning or odor detection, NOS was inhibited *after* conditioning (Fig. 3A). In contrast, we found no significant impairment of proboscis extension one hour later ( $f(1, 28) = .35$ ,  $P = .59$ ,  $N = 5, 5$ ). These results suggest that NO does not interfere with odor detection or retrieval, but does affect learning or memory to the conditioned odor. To further investigate NO and the odor associative effects, responses to a novel odor were examined. The same sets of experiments were performed using hibiscus (Figure 3A). Similar to the results with *Datura*, when NOS inhibition is performed before conditioning, there is significant reduction in the number of proboscis extensions ( $f(1, 40) = 15.92$ ,  $P = .0003$ ,  $N = 7, 7$ ). When NOS is inhibited after conditioning, there is no significance compared with vehicle controls ( $f(1, 43) = 2.87$ ,  $P = .097$ ,  $N = 8, 7$ ). NO appears to be a necessary component during the conditioning process to recognize an odor as rewarding. Taken altogether, there is a significant deficit imposed by NOS inhibition prior to conditioning ( $f(3, 104) = 9.12$ ,  $P = <.0001$ ) without regard to the conditioned odor ( $P = .59$ , post-hoc Tukey-Kramer HSD).



# *NOS inhibition does not affect odorant discrimination between dissimilar odorants*

To test whether NO affects odorant discrimination between chemically dissimilar odorants, moths were tasked with associating linalool (monoterpenoid) or methyl salicylate (aromatic) with a sucrose reward (CS+) (Fig. 3B). The moths were tested by presenting the CS+ alternatively with the unrewarded odorant (CS-) and observing proboscis extension. NOS inhibition was performed after conditioning to rule out learning impairments caused by lack of NO. NOS inhibition does not affect successful discrimination between the CS+ and the CS- ( $f(1, 38) = 7.6$ ,  $P = .009$ ,  $N = 10$ ) and no difference was found between the vehicle controls ( $f(1, 38) = 7.33$ ,  $P = .01$ ,  $N = 10$ ) (Saline vs. L-NAME ( $t(39) = 1.43$   $P = .16$  post-hoc Matched Pairs)).

# *NOS inhibition affects short-term memory trace(s)*

To examine whether NOS inhibition affects learning acquisition or memory, moths were tested at multiple time points over 24 hours (Figs. 4A&B, Table 1). If moths show continued impairment throughout the time points, this would suggest learning acquisition is affected by NO. L-NAME-injected moths show a significant impairment at the one hour time point compared with saline controls ( $f(1, 79) = 23.55$ ,  $P = .0001$ ,  $N = 18, 12$ ), but unexpectedly show significant improvement 24 hours later ( $f(2, 159) = 4.48$ ,  $P = .01$ , Post-Hoc Tukey-Kramer HSD,  $N = 18$ ) (Fig. 4A). These results suggest that NO does not affect learning acquisition, but does affect a memory trace appearing one hour after conditioning.

In comparison with memory traces found in *Drosophila*, this time window borders short-term and intermediate-term memory. A short-term memory trace appears immediately after conditioning in the *Drosophila* ALs and disappears after seven minutes (Yu et al., 2004). To test the effects of NO more conclusively in the short-term memory window, we also tested moths at five minutes post-conditioning in addition to the one hour, four hour, and twenty-four hour time periods (Fig. 4B). At five minutes, L-NAME-injected moths show significant reductions in PER compared with saline controls ( $f(1, 49) = 4.09$ ,  $P = .048$ ,  $N = 10, 7$ ) and confirm our previous findings of a significant PER reduction at one hour ( $f(7, 196) = 6.08$ ,  $P = .0003$ , Post-Hoc Tukey-Kramer HSD). These moths also do not show significant reductions in PER at four hours and twenty-four hours. As a result, there is significant improvement in the PER from short-term time points (five minutes and one hour) to longer-term time points (four hours and 24 hours) ( $f(3, 116) = 7.347$ ,  $P < .0001$ ,  $N = 10, 7$ ). These results suggest that NO affects either one memory trace that spans from at least five minutes to one hour, or that NO affects two short-term memory traces. Taken altogether, these studies (Fig. 4A&B) reveal that L-NAME injected moths fall into three main categories when observed over time: (1) those that are inhibited in the short-term and improve



(57%), (2) those that remain consistently impaired (18%), and (3) those that do not show short-term impairments (21%).

The anticipatory PER responses observed *during* conditioning also suggest NO affects short-term memory. The results of the conditioning trials (collected across experiments with hibiscus as the CS+) reveal that memory deficits by L-NAME appear as early as the fourth trial (Fig. 4C). Moths were conditioned to the CS+ during six trials spaced four minutes apart. During the first trial, before the CS+ is paired with sucrose, there are minimal proboscis extensions to the CS+ odor. By the second and third trial, all treatment groups extend their proboscis in anticipation upwards of 50% of the time. The responses of the control groups, both un-operated and saline-injected moths, continue to increase with additional trials. However, by the fourth trial, L-NAME-injected moths significantly drop in the number of proboscis extensions compared with saline controls of the same trial ( $f = (1, 58) = 4.64$ ,  $P = .035$ ,  $N = 30, 30$ ) and remain significantly impaired through Trial 5 ( $f = (1, 58) = 4.81$ ,  $P = .032$ ,  $N = 30, 30$ ). In Trial 6, L-NAME moths show reduced PER at 47% (Trials 4 & 5: PER 47% and 50% respectively) but is not significantly different from the Trial 6 saline control. These findings further implicate NO as an important signaling component in the creation of short-term memory trace(s).

## Discussion

NO signaling is likely common to all olfactory systems. Previous studies have shown NO exists at tonic low levels (Wilson et al., 2007) that dramatically increase in response to odorants (Collmann et al., 2004; Lowe et al., 2009). We also know that NO modifies whole-cell current in AL neurons (Higgins et al., 2012). While this evidence strongly implicates a role for NO, the functional significance of this modulation is not known. In this study, we have used chemical detection of NO and the PER odor-conditioning assay to understand whether NO basal levels fluctuate and the involvement in basic olfactory tasks.

We have discovered that NO levels are significantly higher in the optic lobes and ALs during the nocturnal active period (Fig. 2). These findings suggest a dynamic temporal role for NO that may contribute to the circadian time of olfactory-dependent activity. In *Manduca*, *period* gene products are found in several cell types, including the compound eye photoreceptors, neurons in the optic lobes, and glia surrounding the glomeruli in the ALs (Wise et al., 2004). In addition, *period* immunoreactivity identified putative circadian pacemaker cells in the antennae that include olfactory receptor neurons and antennal nerve glia (Schuckel et al., 2007). In *Drosophila*, antennae pacemaker cells are found to be necessary and sufficient for olfactory rhythms; therefore suggesting that the components of the olfactory signal transduction cascade could be targets of circadian regulation (Tanoue et al., 2004). NO could very

likely be an important modulator in this process, especially given the expression of NOS in the olfactory receptor neurons in *Manduca*. NO could affect pacemaker cells in the antennae, AL and optic lobes directly, similar to the basal retinal neurons in the mollusk (Bullmann and Stevenson, 2008), or be a downstream result. Given the dramatic physiological effects of NO in AL neurons, NO could act as a “priming” agent that adjusts olfactory and optical circuitry to enable nocturnal behaviors. It would be interesting to note whether the NO peak fluctuation is reversed in diurnal animals, and whether multiple measurements of NO over the light-cycle reveal a light-entrainable circadian pattern.

Heightened NO release during the active period may also indicate specific roles in modulating olfactory-guided behaviors. NO can affect cells in several ways (e.g. by activating protein kinases, phosphodiesterases, and cyclic nucleotide-gated channels) and therefore could mediate many different aspects of olfactory processing. In our studies using the PER assay, we found that NO does not affect odor detection (Fig. 3A) or odor discrimination between dissimilar odorants once the CS+ has been learned (Fig. 3B). NO may play more subtle roles at the cellular level, but these are undetectable using the PER assay. Interestingly, NO does mediate aspects of appetitive-associative conditioning. NOS inhibition revealed a strong impairment to the conditioned odor when tested one hour later (Fig. 3A). Given these initial results, we tested whether NO affects the acquisition of learning—by affecting those biochemical processes that enable learning to occur— or underlies a memory trace present at the time the animals were tested. Testing at additional time intervals suggest the latter (Fig. 4) and specifically implicate NO in short-term memory.

In *Drosophila*, researchers have identified six olfactory memory traces occurring in the ALs and the mushroom bodies (for review see Davis, 2011). These memory traces are likely formed by specific molecular substrates activated through odor conditioning and appear at distinct time lengths after the conditioning period. In our studies, the greatest NOS inhibition impairment was observed at one hour post-conditioning. In comparison with *Drosophila*, this memory trace window falls between short-term and intermediate-term memory and does not appear to distinctly correspond with an identified trace. One short-term *Drosophila* memory trace, however, recruits AL projection neurons into the CS+ representation (Yu et al., 2004). This trace appears and disappears seven minutes after conditioning. We tested moths at five minutes and found a significant NOS inhibition impairment, although not as robust as at one hour (Fig. 4B). This finding may suggest NO affects two memory traces, or these time points could be representative of one trace. The trial data collected *during* conditioning further implicates NO in short-term memory. During the six conditioning trials, NOS inhibition impaired later trial responses, starting with the fourth trial or 12 minutes into conditioning (Fig. 4C). Taken altogether, these results suggests that instead of deficits in learning acquisition, NO affects specific molecular substrates

underlying short-term memory trace(s), while leaving intermediate-term (four hours post) and long-term traces (24 hours post) intact.

The time course of these NO-mediated memory trace(s) is strikingly similar to the nocturnal habits of flowering and feeding between *Datura* (Solanaecea) and hawkmoths (Sphingidae). In Southern Arizona, *Manduca sexta* feed from trumpet-shaped, *Datura Wrightii* flowers in a relationship that has co-evolved over time (Riffell et al., 2008a&b, Raguso et al., 2003). *Datura* flowers open at dusk and wilt during the morning hours of the next day (Grant, 1983; Raguso and Willis, 2005). Nectar production is slight when flowers first open, but flows at peak abundance 1-2 hours later (Grant, 1983) and significantly decreases 3.3 hours after opening (Guerenstein et al., 2004). *Manduca sexta* and other hawkmoths forage at this peak nectar time for 1-2 hours and sometimes beyond, but never at the levels observed during the first hour (Gregory, 1963; Raguso and Willis, 2005). It appears that this co-evolved relationship depends on a narrow, 1-2 hour time range, with an emphasis on the first hour. The importance of this feeding window unexpectedly corresponds to our observation that NOS inhibitory effects are strongest at one hour. These observations suggest that a one-hour memory trace between volatiles and nectar may be biologically significant and part of the co-evolution between *Manduca* and *Datura*. It is interesting that *Datura*, known to cause innate responses in *Manduca*, would still illicit strong memory impairments after NOS inhibition. This may suggest that NO contributes to the physiology underlying the tightly coupled timing of foraging and nectar production. Moreover, when *Datura* are not locally abundant, it becomes necessary for *Manduca* to learn to feed from other species like *Agave* (Riffell et al., 2008a&b), thus demonstrating that learning and memory is important at this time of day.

In conclusion, our observations reveal functional roles of NO in the olfactory system. NO production is higher during the nocturnal active period and is necessary for short-term memory. This increased level of NO coincides with robust learning and memory responses in the laboratory and prior observations in the field. The precise timing of foraging and nectar production between *Manduca* and *Datura* suggests that NO may be important for the timing of olfactory-guided behaviors. It is, therefore, a plausible hypothesis for future studies that NO may mediate the coordination of physiological processes that enable animals to anticipate regular stimuli in the environment.

## Figure Legends

**Figure 1: Views of the ALs during surgery and dye injection.** *Above:* Visualization of the ALs through the surgical window (note: connective tissues removed for clarity). *Below:* Visualization of volume distribution by injection into the ALs. Dashed lines highlight edges of the AL.

**Figure 2: Basal NO levels fluctuate with light cycle in the *Manduca* brain.** ALs, optic lobes and the remainder of the brain (protocerebrum, tritocerebrum and the sub-esophageal ganglion) were measured for NO concentration during scotophase and photophase. Mean NO concentration is significantly higher during scotophase than photophase in the ALs ( $t(17) = 8.04$ ,  $P < .0001$ , Student's T-Test,  $N = 11, 8$ ) and optic lobes ( $t(14) = 5.78$ ,  $P < .0001$ , Student's T-Test,  $N = 8, 8$ ) but not in the remainder of the brain ( $t(9) = .17$ ,  $P = .87$ , Student's T-Test,  $N = 5, 6$ ). Error bars denote s. d..

**Figure 3: NOS inhibition diminishes PER before odor conditioning, but not afterwards.** A.) NOS inhibition by L-NAME reduces PER when injected into the ALs before conditioning but not after conditioning to both *Datura* and hibiscus odors. The effect of L-NAME in PER was measured vs. saline control using a One-Way ANOVA. Before conditioning, L-NAME significantly reduces PER with *Datura* as the CS+ ( $f(1, 64) = 11.18$ ,  $P = .001$ ,  $N = 11, 11$ ) and hibiscus as the CS+ ( $f(1, 40) = 15.92$ ,  $P = .0003$ ,  $N = 7, 7$ ) Asterisks denote significance between L-NAME and saline groups conditioned with the same odor. B.) L-NAME injection after conditioning does not affect successful discrimination between chemically dissimilar odorants linalool and methyl salicylate ( $f(1, 38) = 7.6$ ,  $P = .009$ ,  $N = 10$ , One-Way ANOVA).

**Figure 4: NOS inhibition affects PER differently over time.** A.) Animals were tested at one hour, four hours, and twenty-four hours post-conditioning. L-NAME treated moths show significant improvement in PER from one hour to twenty-four hours ( $f(2, 159) = 4.48$ ,  $P = .01$ , Post-Hoc Tukey-Kramer HSD,  $N = 18$ ) B.) L-NAME also impairs the PER at five minutes post-conditioning and again at one hour post-conditioning. At four hours and twenty-four hours post-conditioning, moths significantly improve PER to the CS+ ( $f(3, 116) = 7.347$ ,  $P < .0001$ , Post-Hoc Tukey-Kramer HSD,  $N = 10, 7$ ). (C.) L-NAME reduces PER during the later trials of conditioning with hibiscus as CS+. L-NAME injected moths significantly drop in PER during trials four ( $f(1, 58) = 4.64$ ,  $P = .035$ ,  $N = 30, 30$ , One-Way ANOVA) and five ( $f(1, 58) = 4.81$ ,  $P = .032$ ,  $N = 30, 30$ , One-Way ANOVA) when compared with saline controls of the same trial.

## Acknowledgments

The authors wish to thank the members of the Nighorn and Hildebrand laboratories. In particular, Dr. Andrew Dacks for helpful discussions, Dr. Jeff Riffell for guidance with conditioning and the *Datura* blend, Oliver Ko for assistance in NO detection and Teresa Gregory for insect rearing.

## Funding

This work was supported by the National Institutes of Health [DC004292 to A.N.] and through the Graduate Student Research Support Award by the Center for Insect Science at the University of Arizona to S.G.

## List of Abbreviations

|                |                                         |
|----------------|-----------------------------------------|
| AL             | Antennal lobe                           |
| cGMP           | Cyclic guanosine monophosphate          |
| CS+            | Conditioned stimulus; rewarded          |
| CS-            | Conditioned stimulus; unrewarded        |
| L-NAME         | <i>N</i> -Nitro-L-arginine methyl ester |
| <i>Manduca</i> | <i>Manduca sexta</i>                    |
| NO             | Nitric oxide                            |
| NOS            | Nitric oxide synthase                   |
| PER            | Proboscis extension reflex              |
| sGC            | Soluble guanylyl cyclase                |

## References

- Bozza, T., Feinstein, P., Zheng, C. and Mombaerts, P.** (2002). Odorant receptor expression defines functional units in the mouse olfactory system. *J.Neurosci.* **22**(8), 3033-3043.
- Bredt, D. S., Glatt, C. E., Hwang, P. M., Fotuhi, M., Dawson, T. M. and Snyder, S. H.** (1991). Nitric oxide synthase protein and mRNA are discretely localized in neuronal populations of the mammalian CNS together with NADPH diaphorase. *Neuron* **7**(4), 615-624.
- Breer, H. and Shepherd, G. M.** (1993). Implications of the NO/cGMP system for olfaction. *Trends Neurosci.* **16**(1), 5-9.
- Bullmann, T. and Stevenson, P. A.** (2008). Nitric oxide as an efferent modulator of circadian pacemaker neurones in the eye of the marine mollusc *Bulla gouldiana*. *Open Zoolog. J.* **1**, 18-28.
- Collmann, C., Carlsson, M. A., Hansson, B. S. and Nighorn, A.** (2004). Odorant-evoked nitric oxide signals in the antennal lobe of *Manduca sexta*. *J.Neurosci.* **24**(27), 6070-6077.
- Dacks, A. M., Christensen, T. A. and Hildebrand, J. G.** (2008). Modulation of olfactory information processing in the antennal lobe of *Manduca sexta* by serotonin. *J.Neurophysiol.* **99**(5), 2077-2085.
- Daly, K. C. and Smith, B. H.** (2000). Associative olfactory learning in the moth *Manduca sexta*. *J.Exp.Biol.* **203**(Pt 13), 2025-2038.
- Davis, N. T. and Hildebrand, J. G.** (2006). Neuroanatomy of the sucking pump of the moth, *Manduca sexta* (sphingidae, lepidoptera). *Arthropod Struct.Dev.* **35**(1), 15-33.
- Davis, R. L.** (2011). Traces of *Drosophila* memory. *Neuron* **70**(1), 8-19.
- Elphick, M., Rayne, R., Riveros-Moreno, V. V., Moncada, S. and Shea, M.** (1995). Nitric oxide synthesis in locust olfactory interneurons. *J.Exp.Biol.* **198**(Pt 3), 821-829.
- Farkas, A., Kerchner, A., Deri, H., Boros, B. and Darok, J.** (2011). Nectary structure and nectar production of various *Datura* species. *Intl. J. Plant Reproduct.* **3**(1),1.
- Fujie, S., Aonuma, H., Ito, I., Gelperin, A. and Ito, E.** (2002). The nitric oxide/cyclic GMP pathway in the olfactory processing system of the terrestrial slug *Limax marginatus*. *Zoolog Sci.* **19**(1), 15-26.



**Gelperin, A.** (1994). Nitric oxide mediates network oscillations of olfactory interneurons in a terrestrial mollusc. *Nature* **369**(6475), 61-63.

**Giurfa, M. and Sandoz, J. C.** (2012). Invertebrate learning and memory: Fifty years of olfactory conditioning of the proboscis extension response in honeybees. *Learn.Mem.* **19**(2), 54-66.

**Grant, V.** (1983). Behavior of hawkmoths on flowers of *Datura meteloides*. *Botanical Gazette* **144**(2), pp. 280-284.

**Gregory, D. P.** (1963). Hawkmoth pollination in the genus *oenothera*. *Aliso* **5**, 357-384.

**Guerenstein, P. G., A Yopez, E., Van Haren, J., Williams, D. G. and Hildebrand, J. G.** (2004). Floral CO<sub>2</sub> emission may indicate food abundance to nectar-feeding moths. *Naturwissenschaften* **91**(7), 329-333.

**Higgins, M., Miller, M., & Nighorn, A.** (2012). Nitric oxide has differential effects on currents in different subsets of *Manduca sexta* antennal lobe neurons. *PLoS One*, **7**(8), e42556.

**Hildebrand, J. G. and Shepherd, G. M.** (1997). Mechanisms of olfactory discrimination: Converging evidence for common principles across phyla. *Annu.Rev.Neurosci.* **20**, 595-631.

**Hopkins, D. A., Steinbusch, H. W., Markerink-van Ittersum, M. and De Vente, J.** (1996). Nitric oxide synthase, cGMP, and NO-mediated cGMP production in the olfactory bulb of the rat. *J.Comp.Neurol.* **375**(4), 641-658.

**Kauer, J. S. and Cinelli, A. R.** (1993). Are there structural and functional modules in the vertebrate olfactory bulb? *Microsc.Res.Tech.* **24**(2), 157-167.

**Kelley, J. B., Anderson, K. L. and Itzhak, Y.** (2010). Pharmacological modulators of nitric oxide signaling and contextual fear conditioning in mice. *Psychopharmacology (Berl)* **210**(1), 65-74.

**Kendrick, K. M., Guevara-Guzman, R., Zorrilla, J., Hinton, M. R., Broad, K. D., Mimmack, M. and Ohkura, S.** (1997). Formation of olfactory memories mediated by nitric oxide. *Nature* **388**(6643), 670-674.

**Lei, H., Riffell, J. A., Gage, S. L. and Hildebrand, J. G.** (2009). Contrast enhancement of stimulus intermittency in a primary olfactory network and its behavioral significance. *J Biol.* **8**

- Lowe, G., Buerk, D. G., Ma, J. and Gelperin, A.** (2008). Tonic and stimulus-evoked nitric oxide production in the mouse olfactory bulb. *Neuroscience* **153**(3), 842-850.
- Mori, K., Nagao, H. and Yoshihara, Y.** (1999). The olfactory bulb: Coding and processing of odor molecule information. *Science* **286**(5440), 711-715.
- Muller, U.** (1996). Inhibition of nitric oxide synthase impairs a distinct form of long-term memory in the honeybee, *Apis mellifera*. *Neuron* **16**(3), 541-549.
- Muller, U. and Hildebrandt, H.** (1995). The nitric oxide/cGMP system in the antennal lobe of *Apis mellifera* is implicated in integrative processing of chemosensory stimuli. *Eur.J.Neurosci.* **7**(11), 2240-2248.
- Mutlu, O., Ulak, G. and Belzung, C.** (2011). Effects of nitric oxide synthase inhibitors 1-(2-trifluoromethylphenyl) - imidazole (TRIM) and 7-nitroindazole (7-NI) on learning and memory in mice. *Fundam.Clin.Pharmacol.* **25**(3), 368-377.
- Nighorn, A., Gibson, N. J., Rivers, D. M., Hildebrand, J. G. and Morton, D. B.** (1998). The nitric oxide-cGMP pathway may mediate communication between sensory afferents and projection neurons in the antennal lobe of *Manduca sexta*. *J.Neurosci.* **18**(18), 7244-7255.
- Pinching, A. J.** (1970). Synaptic connexions in the glomerular layer of the olfactory bulb. *J.Physiol.* **210**(1), 14-15.
- Prendergast, M. A., Terry, A. V., Jr, Jackson, W. J., and Buccafusco, J. J.** (1997a). Nitric oxide synthase inhibition impairs delayed recall in mature monkeys. *Pharmacol.Biochem.Behav.* **56**(1), 81-87.
- Prendergast, M. A., Buccafusco, J. J., & Terry, A. V., Jr.** (1997b). Nitric oxide synthase inhibition impairs spatial navigation learning and induces conditioned taste aversion. *Pharmacol.Biochem.Behav.*, **57**(1-2), 347-352.
- Price, J. L. and Powell, T. P.** (1970). The mitral and short axon cells of the olfactory bulb. *J.Cell.Sci.* **7**(3), 631-651.

- Raguso, R. A. and Willis, M. A.** (2002). Synergy between visual and olfactory cues in nectar feeding by naive hawkmoths, *Manduca sexta*. *Animal Behav.* **64**, 685-695.
- Raguso, R. A. and Willis, M. A.** (2005). Synergy between visual and olfactory cues in nectar feeding by wild hawkmoths, *Manduca sexta*. *Animal Behav.* **69**, 407-418.
- Raguso, R. A., Henzel, C., Buchmann, S. L. and Nabhan, G. P.** (2003). Trumpet flowers of the sonoran desert: Floral biology of *Peniocereus cacti* and sacred datura. *Intl. J. Plant Biol.* **164**, 877-892.
- Riffell, J. A., Alarcon, R. and Abrell, L.** (2008a). Floral trait associations in hawkmoth-specialized and mixed pollination systems: *Datura wrightii* and *Agave* spp. in the sonoran desert. *Commun.Integr.Biol.* **1**(1), 6-8.
- Riffell, J. A., Alarcon, R., Abrell, L., Davidowitz, G., Bronstein, J. L. and Hildebrand, J. G.** (2008b). Behavioral consequences of innate preferences and olfactory learning in hawkmoth-flower interactions. *Proc.Natl.Acad.Sci.U.S.A.* **105**(9), 3404-3409.
- Riffell, J. A., Lei, H., Christensen, T. A. and Hildebrand, J. G.** (2009). Characterization and coding of behaviorally significant odor mixtures. *Curr.Biol.* **19**(4), 335-340.
- Samama, B. and Boehm, N.** (1999). Inhibition of nitric oxide synthase impairs early olfactory associative learning in newborn rats, *Neurobiol.Learn.Mem.* **71**(2), 219-231.
- Schuckel, J., Siwicki, K. K. and Stengl, M.** (2007). Putative circadian pacemaker cells in the antenna of the hawkmoth *Manduca sexta*. *Cell Tissue Res.* **330**(2), 271-278.
- Susswein, A. J., Katzoff, A., Miller, N. and Hurwitz, I.** (2004). Nitric oxide and memory. *Neuroscientist* **10**(2), 153-162.
- Takeda, K.** (1961). Classical conditioned response in the honey bee. *J. Insect Physiol.* **6**, 168-179.
- Tanoue, S., Krishnan, P., Krishnan, B., Dryer, S. E. and Hardin, P. E.** (2004). Circadian clocks in antennal neurons are necessary and sufficient for olfaction rhythms in *Drosophila*. *Curr.Biol.* **14**(8), 638-649.

**Tolbert, L. P. and Oland, L. A.** (1990). Glial cells form boundaries for developing insect olfactory glomeruli. *Exp.Neurol.* **109**(1), 19-28.

**Wachowiak, M. and Shipley, M. T.** (2006). Coding and synaptic processing of sensory information in the glomerular layer of the olfactory bulb. *Semin.Cell Dev.Biol.* **17**(4), 411-423.

**Wilson, C. H., Christensen, T. A. and Nighorn, A. J.** (2007). Inhibition of nitric oxide and soluble guanylyl cyclase signaling affects olfactory neuron activity in the moth, *Manduca sexta*. *J.Comp.Physiol.A.Neuroethol Sens.Neural Behav.Physiol.* **193**(7), 715-728.

**Wise, S., Davis, N. T., Tyndale, E., Noveral, J., Folwell, M. G., Bedian, V., Emergy, I. F. and Siwicki, K. K.** (2002). Neuroanatomical studies of period gene expression in the hawkmoth, *Manduca sexta*. *J.Comp.Neurol.* **447**(4), 366-380.

**Yabumoto, T., Takanashi, F., Kirino, Y. and Watanabe, S.** (2008). Nitric oxide is involved in appetitive but not aversive olfactory learning in the land mollusk *Limax valentianus*. *Learn.Mem.* **15**(4), 229-232.

**Yamada, K., Noda, Y., Nakayama, S., Komori, Y., Sugihara, H., Hasegawa, T., et al.** (1995). Role of nitric oxide in learning and memory and in monoamine metabolism in the rat brain. *Br.J.Pharmacol.*, **115**(5), 852-858.

**Yeh, C. I. and Powers, A. S.** (2005). Effects of blocking nitric oxide on learning in turtles (*Chrysemys picta*). *Behav.Neurosci.* **119**(6), 1656-1661.

**Yu, D., Ponomarev, A. and Davis, R. L.** (2004). Altered representation of the spatial code for odors after olfactory classical conditioning; memory trace formation by synaptic recruitment. *Neuron* **42**(3), 437-449.

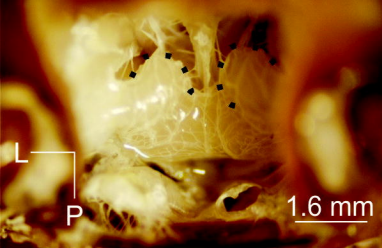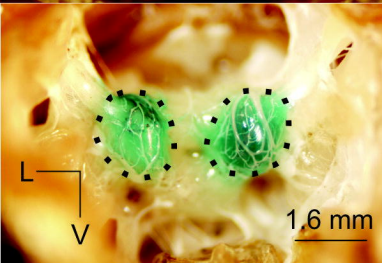

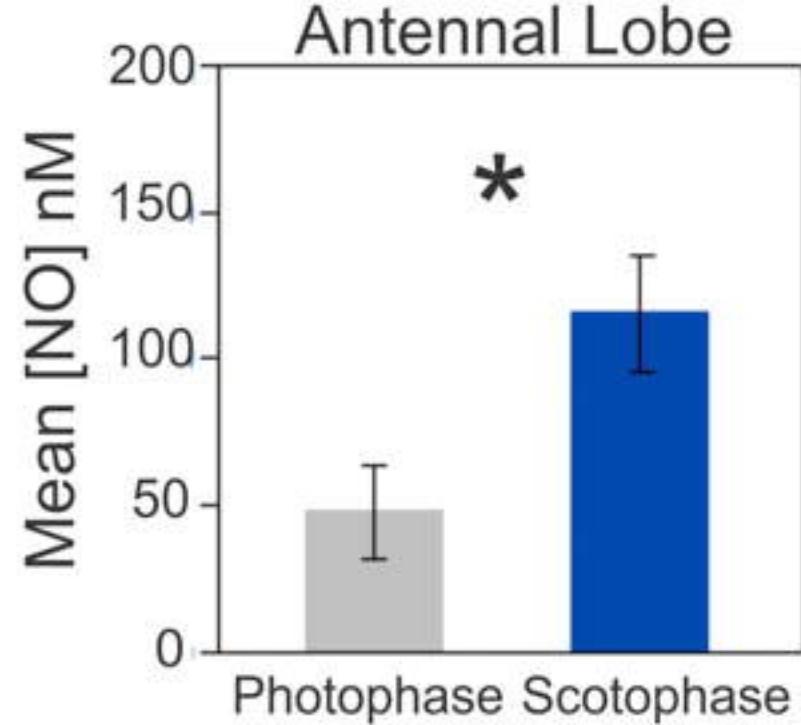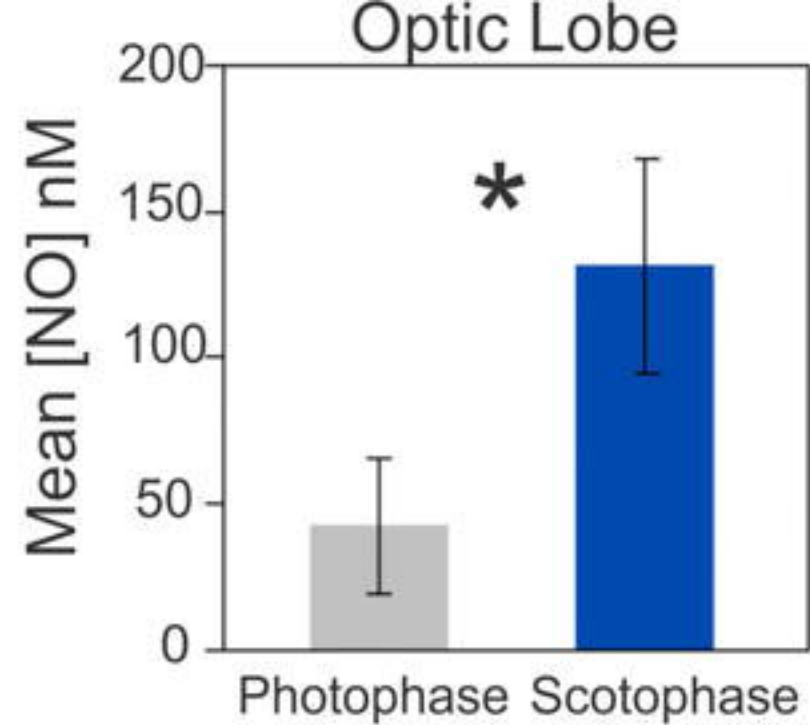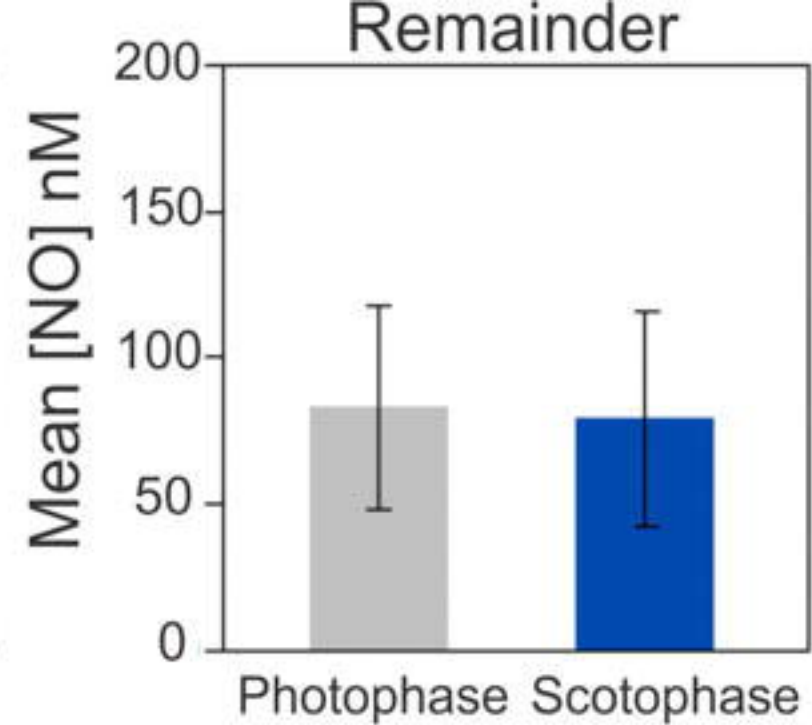

2A

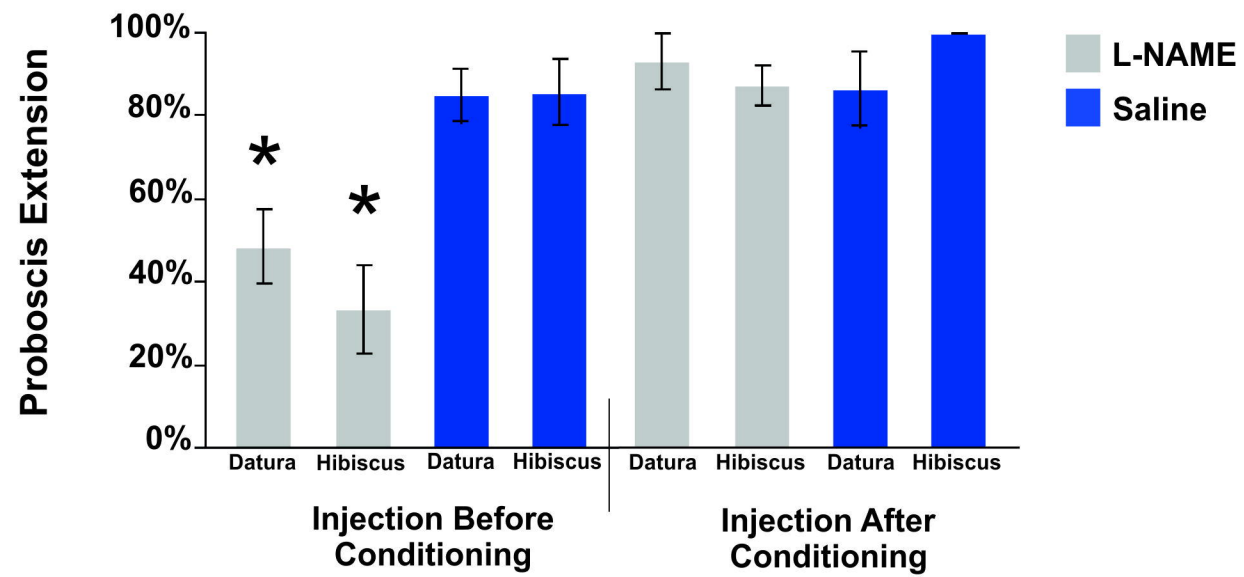

2B

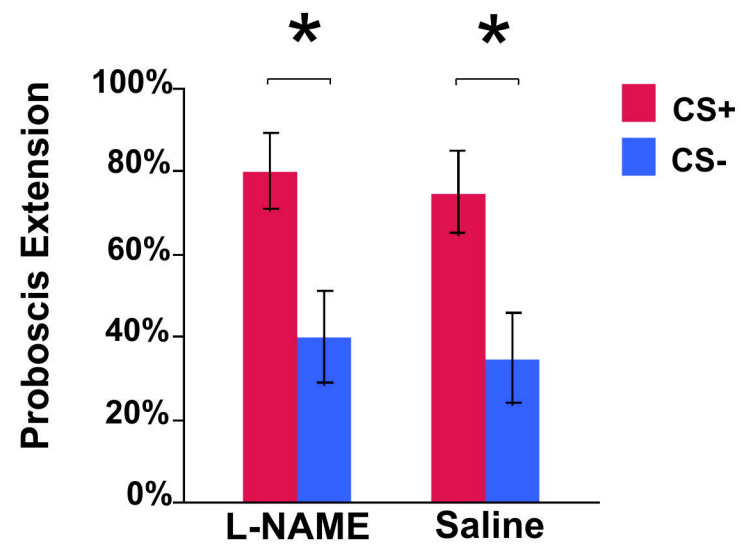



3A

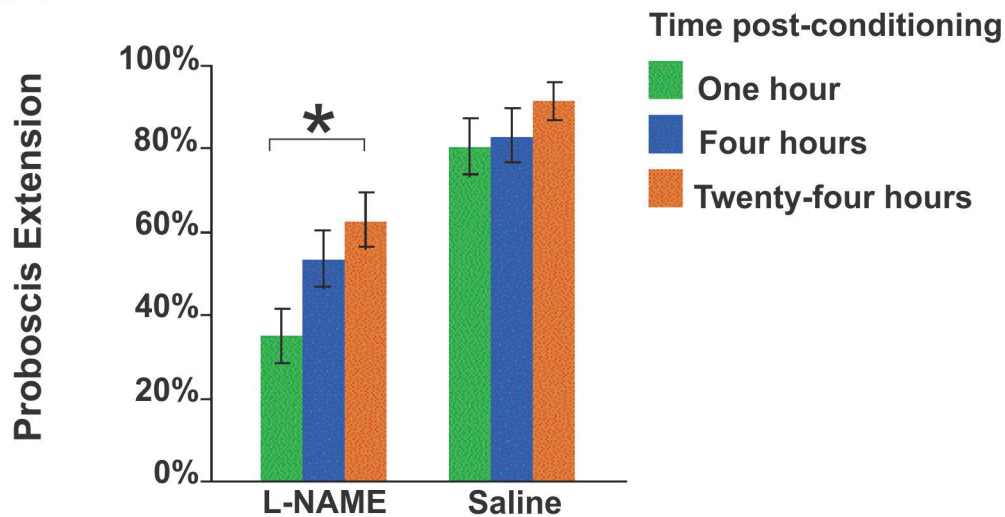

3B

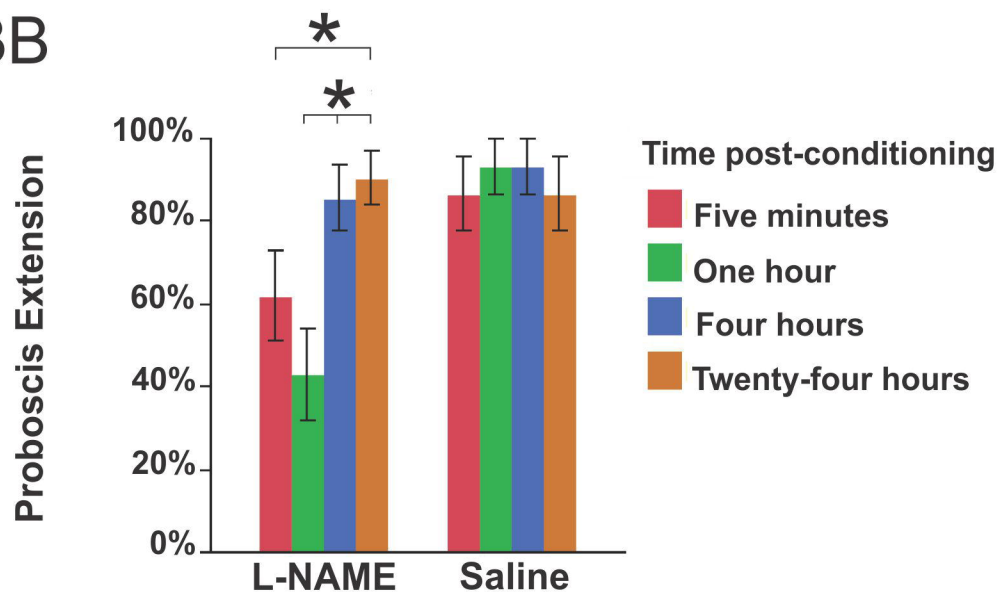

3C

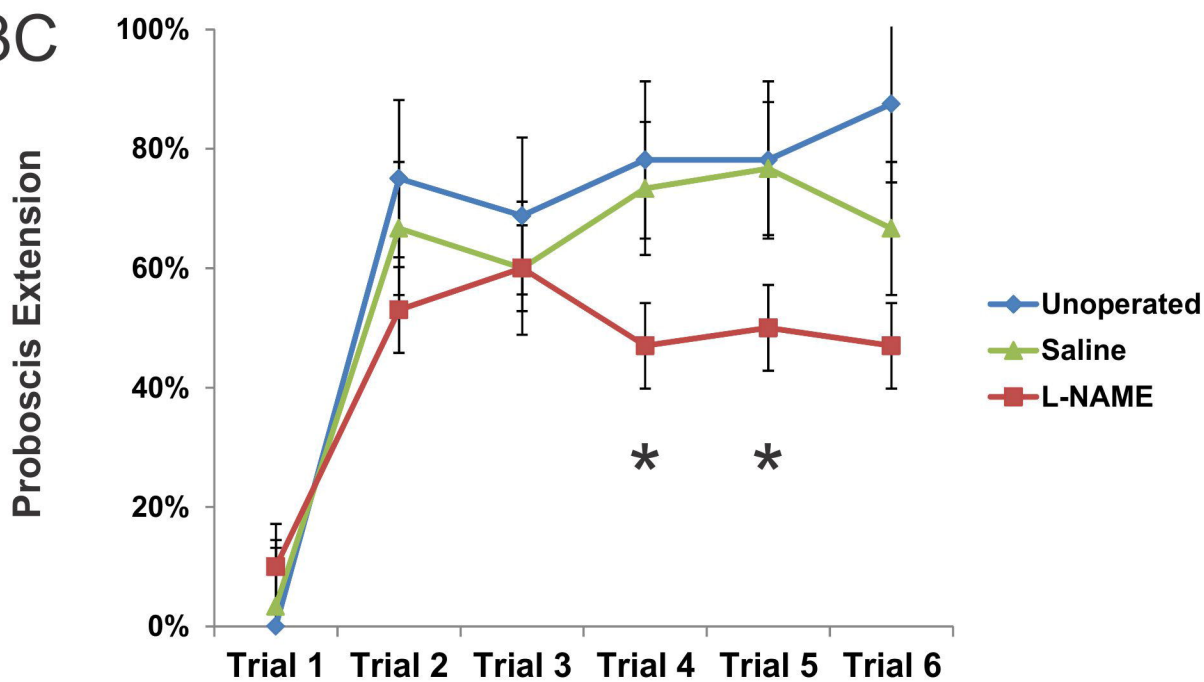

Source: https://cob.silverchair.com/jeb/article-pdf/doi/10.1242/jeb.086694/2036890/jeb_086694.pdf
